# Supplementary material for: Tunable regulation of CREB DNA binding activity couples genotoxic stress response and metabolism
Source: PubMed Central journal article supplement — Nucleic Acids Res. 2016 Jul 18;44(20):9667–80. doi: 10.1093/nar/gkw643 (PMC5175338; doi:10.1093/nar/gkw643), 2016-07-18
Supplement: supp_gkw643_nar-01504-v-2016-File003.pdf [file supp_gkw643_nar-01504-v-2016-File003.pdf]

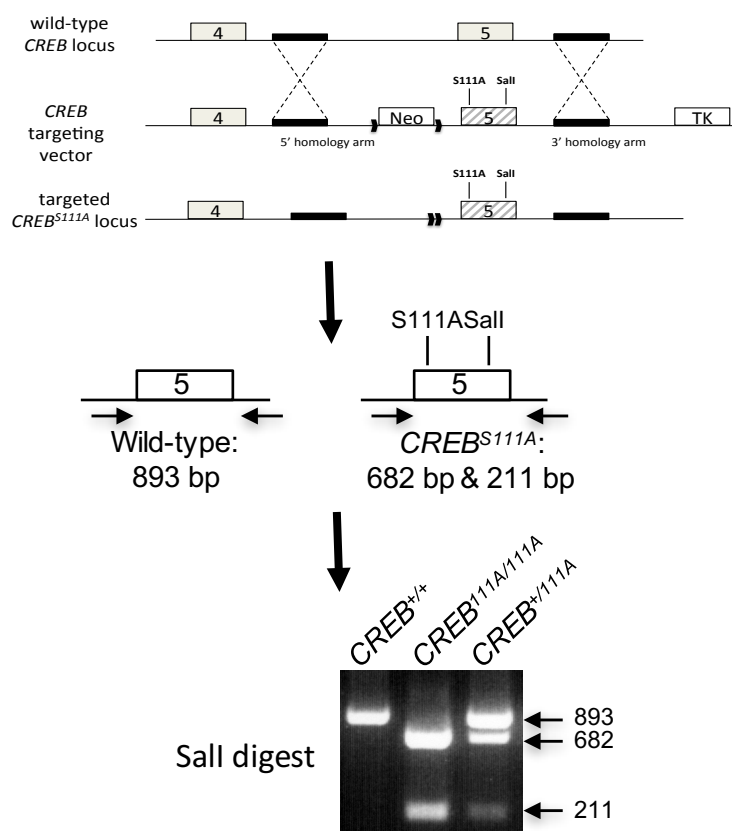

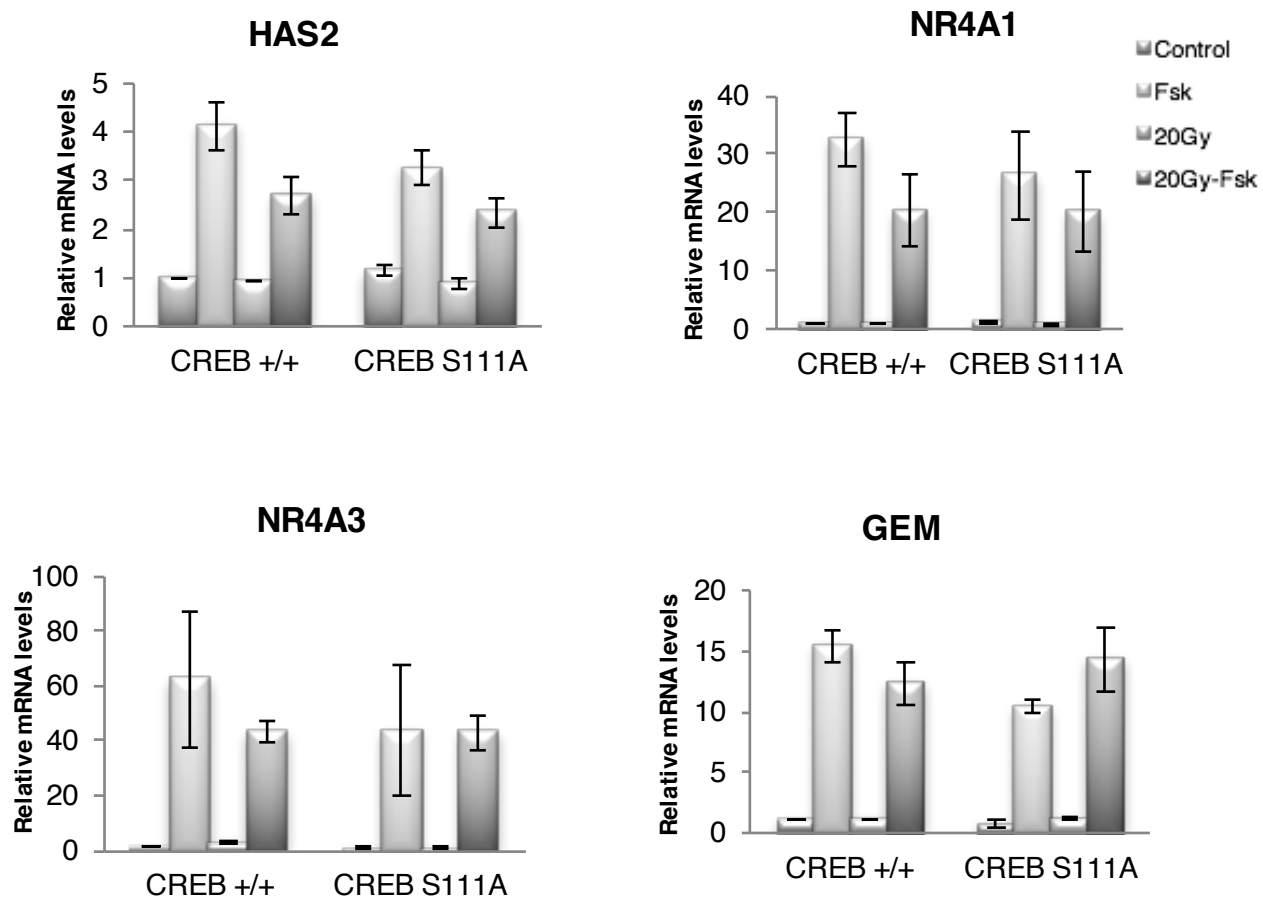

**A**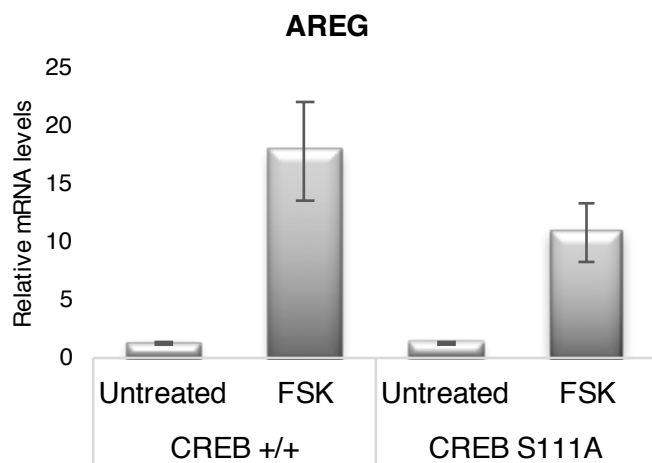**B**

| Gene Symbol             | CREB WT                      | CREB S111A                   |
|-------------------------|------------------------------|------------------------------|
|                         | Fold Change Fsk vs Untreated | Fold Change Fsk vs Untreated |
| Il6                     | 129.399                      | 95.7367                      |
| Cxcl1                   | 100.005                      | 59.5309                      |
| Nr4a2                   | 75.3046                      | 27.6409                      |
| C2cd4b                  | 70.321                       | 41.3176                      |
| Nr4a2                   | 65.9165                      | 30.0651                      |
| Areg                    | 35.7718                      | 17.4004                      |
| Has1                    | 33.3331                      | 22.6031                      |
| chr17:8718223-8949898_F | 31.7808                      | 29.9811                      |
| Nefl                    | 31.2453                      | 19.1747                      |
| Fos                     | 30.2969                      | 17.9173                      |
| Rasd1                   | 30.0224                      | 35.6402                      |
| Scrt1                   | 29.0702                      | 33.4681                      |
| Junb                    | 28.6352                      | 7.5979                       |
| Rgs2                    | 25.2571                      | 21.4995                      |
| Kcne4                   | 24.9028                      | 13.0753                      |
| Apold1                  | 24.6611                      | 17.0207                      |
| Ier3                    | 21.6771                      | 7.59684                      |
| Nr4a3                   | 19.5444                      | 19.9765                      |
| Gem                     | 19.254                       | 11.8194                      |
| Gem                     | 17.9409                      | 7.48006                      |
| C2cd4a                  | 17.7021                      | 8.61539                      |
| Rgs2                    | 17.5774                      | 23.2303                      |
| Kcne4                   | 16.7445                      | 11.7443                      |
| Ptgs2                   | 16.1898                      | 5.57756                      |
| Sik1                    | 15.6338                      | 16.6471                      |

**A**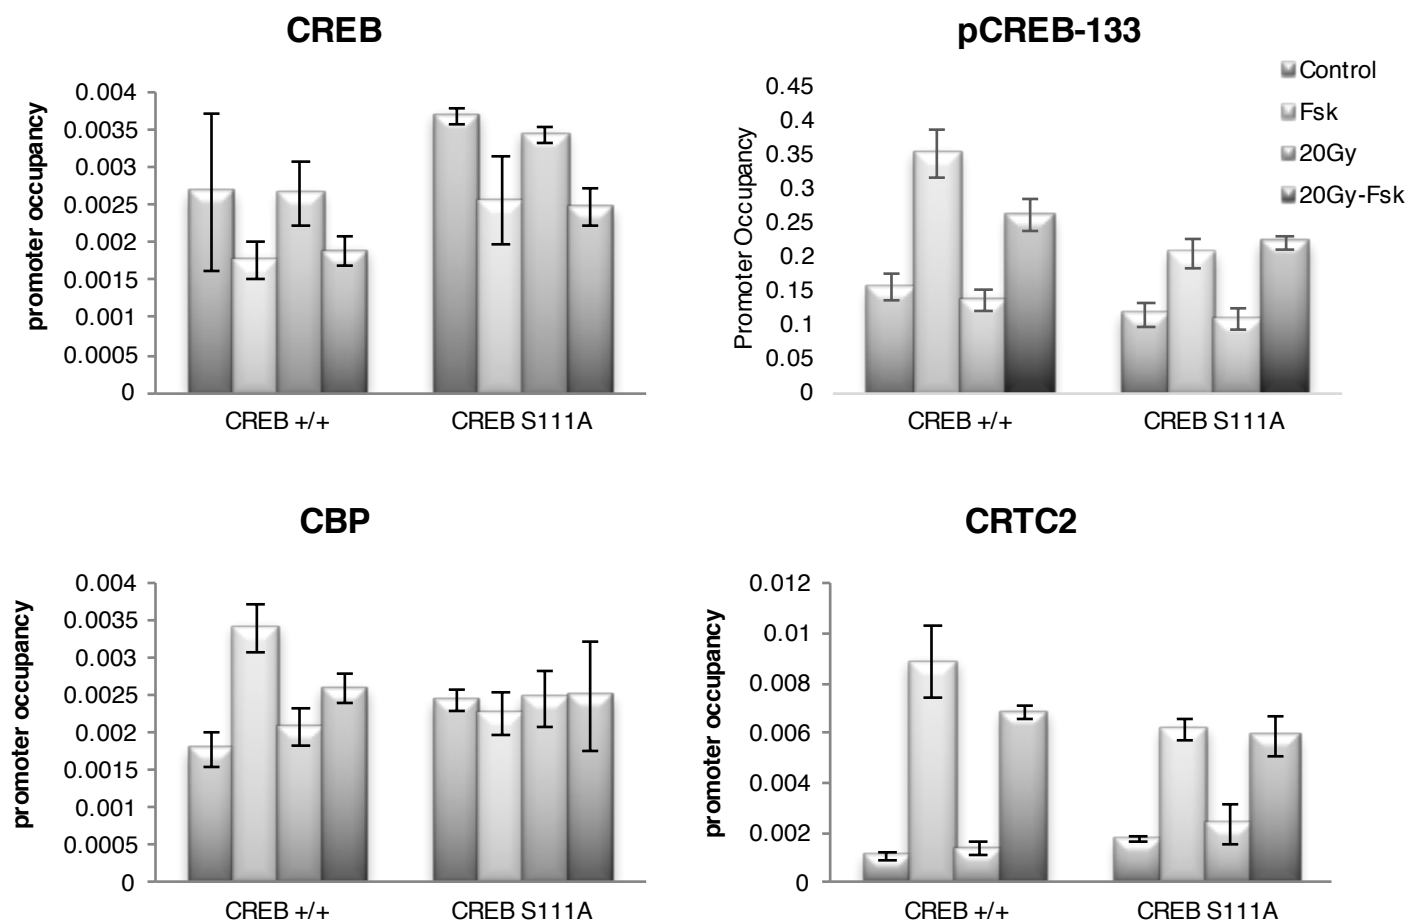**B**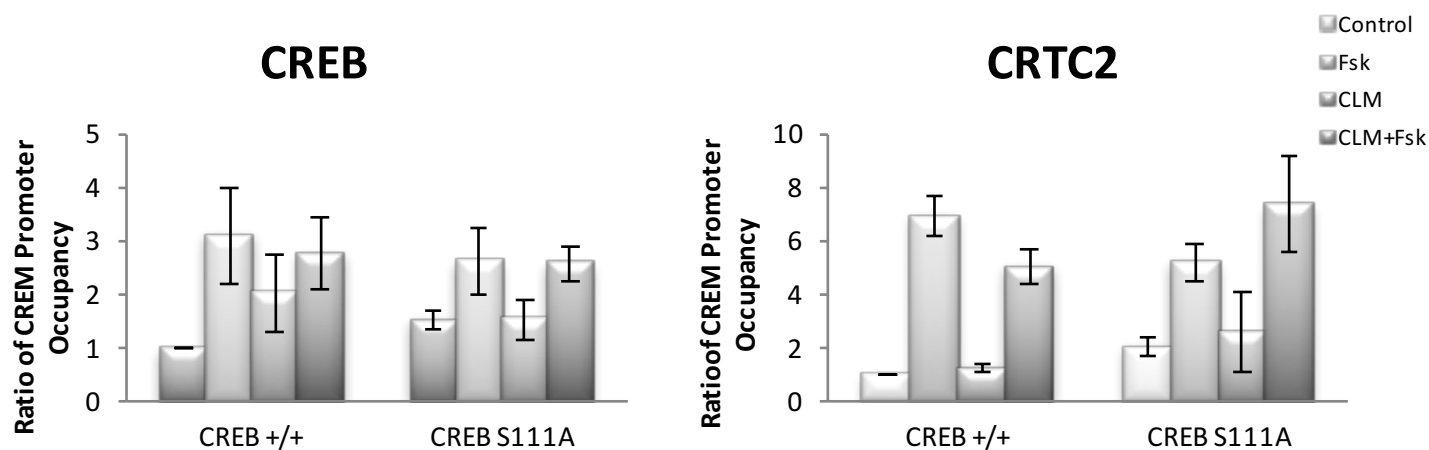

A

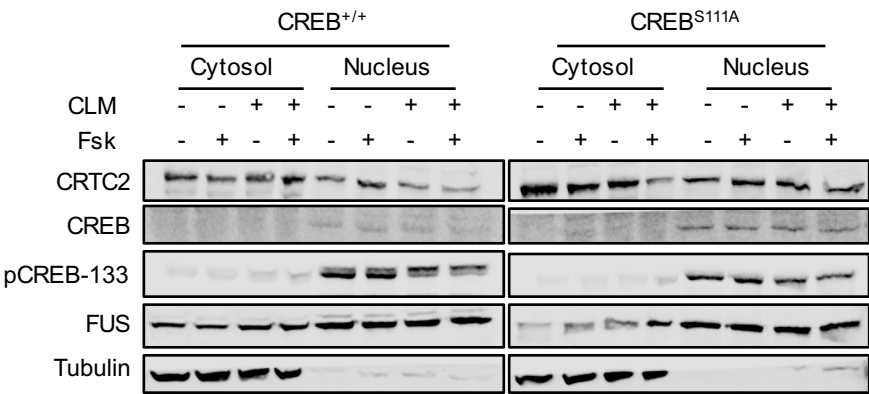

B

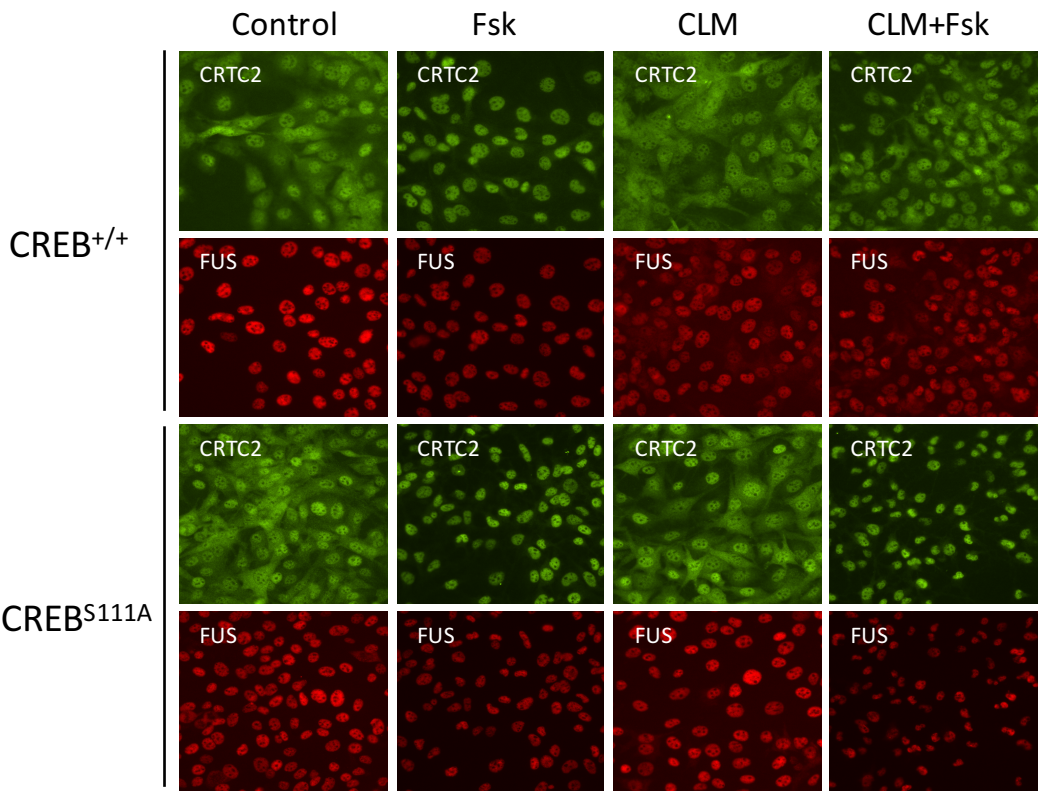

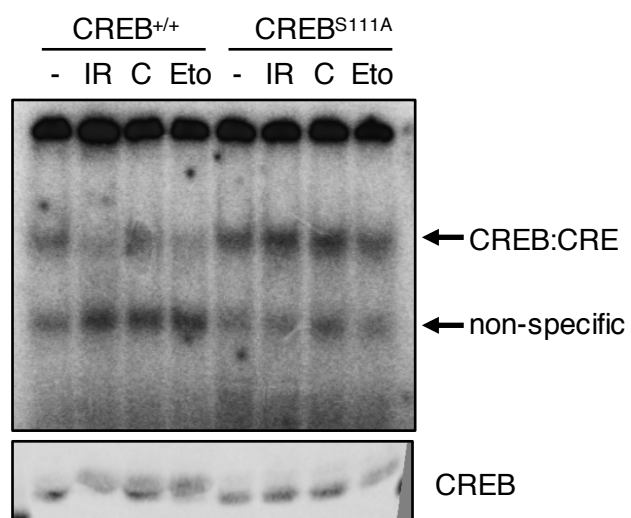

## **Supplementary Figure Legends**

### **Supplementary Figure S1.**

cAMP-induced phosphorylation of the ATM/CK cluster is independent of S133 phosphorylation. *CREB*<sup>+/+</sup> and *CREB*<sup>S133A</sup> MEFs were treated with Fsk, and the cells were collected at the indicated times. Cell extracts were analyzed using  $\alpha$ -CREB, or  $\alpha$ -pCREB-133 antibodies.

### **Supplementary Figure S2.**

CREB gene targeting strategy

### **Supplementary Figure S3.**

Analysis of CREB target gene expression in *CREB*<sup>+/+</sup> and *CREB*<sup>S111A</sup> MEFs. *CREB*<sup>+/+</sup> and *CREB*<sup>S111A</sup> MEFs were treated with Fsk for 90 min, irradiated with 20 Gy IR for 120 min (20 Gy), or treated with Fsk for 90 min after 20 Gy IR for 30 min (20 Gy-Fsk). mRNA amounts for HAS2, NR4A1, NR4A3, or GEM in MEFs were analyzed by quantitative real-time PCR. Each bar represents averaged results, n=3. Error bars indicate SEM.

### **Supplementary Figure S4.**

Reduced cAMP-inducible gene expression in *CREB*<sup>S111A</sup> mice. **(A)** *CREB*<sup>+/+</sup> and *CREB*<sup>S111A</sup> MEFs were treated with Fsk for 90 min. mRNA amounts for AREG in MEFs were analyzed by quantitative real-time PCR. Each bar represents averaged results, n=24. Error bars indicate SEM. **(B)** Comparison of the most highly upregulated genes between Fsk-treated *CREB*<sup>+/+</sup> MEFs and *CREB*<sup>S111A</sup> MEFs (n=6).

### **Supplementary Figure S5.**

AREG and CREM promoter occupancy between *CREB*<sup>+/+</sup> and *CREB*<sup>S111A</sup> MEFs. **(A)** IR-dependent reduction of coactivator recruitment to CREB target gene promoters in primary MEFs. *CREB*<sup>+/+</sup> and *CREB*<sup>S111A</sup> MEFs were treated with Fsk for 90 min, irradiated with 20 Gy IR for 120 min (20 Gy), or treated with Fsk for 90 min after 20 Gy IR for 30 min (20 Gy-Fsk). ChIP assays show that occupancy of CREB, pCREB-133, CRTC2 or CBP on the CREB binding site at AREG promoter. Each bar represents averaged results, n=3. Error bars indicate SEM. **(B)** CLM-dependent reduction of coactivator recruitment to the CREB binding site in the CREM promoter. Immortalized *CREB*<sup>+/+</sup> and *CREB*<sup>S111A</sup> MEFs were treated with Fsk for 90 min, treated with 2 nM CLM for 120 min (CLM), or treated with Fsk for 90 min after 2 nM CLM for 30 min (CLM+Fsk). ChIP assays show that occupancy of CREB and CRTC2 on the CREB binding site at CREM promoter. Each bar represents averaged results, n=3. Error bars indicate SEM.

### **Supplementary Figure S6.**

cAMP-induced CRTC2 nuclear translocation is resistant to DNA damage. **(A)** Immortalized *CREB*<sup>+/+</sup> and *CREB*<sup>S111A</sup> MEFs were treated with Fsk for 90 min, treated with 2 nM CLM for 120 min (CLM), or treated with Fsk for 90 min after 2 nM CLM for 30 min (CLM+Fsk). Cells were fractionated into cytoplasmic or nuclear fractions. The fractionated proteins were analyzed by Western blotting with  $\alpha$ -CRTC2,  $\alpha$ -CREB,  $\alpha$ -pCREB-133,  $\alpha$ -FUS or  $\alpha$ - $\beta$ -tubulin antibodies. **(B)** Immortalized *CREB*<sup>+/+</sup> and *CREB*<sup>S111A</sup> MEFs were treated with the same condition of **(A)**, and the cells were immunostained with  $\alpha$ -CRTC2 and  $\alpha$ -FUS antibodies.

**Supplementary Figure S7.**

Mechanistically distinct DNA damaging agents reduced CREB binding to CRE. EMSA was performed using cell lysates from primary *CREB*<sup>+/+</sup> and *CREB*<sup>S111A</sup> MEFs treated with IR (20 Gy, 1h), CPT (10 μM, 2 h), or Etoposide (5 μM, 2 h).

**Supplementary Table S1A.**

Top 50 Fsk-induced genes in *CREB*<sup>+/+</sup> MEFs

**Supplementary Table S1B.**

Top 50 Fsk-induced genes in *CREB*<sup>S111A</sup> MEFs
